# Supplementary material for: Thermoperiodic growth control by gibberellin does not involve changes in photosynthetic or respiratory capacities in pea
Source: PubMed Central journal article supplement — J Exp Bot. 2009 Dec 18;61(4):1015–29. doi: 10.1093/jxb/erp366 (PMC2826646; doi:10.1093/jxb/erp366), 2009-12-18

# Thermoperiodic growth control by gibberellin does not involve changes in photosynthetic or respiratory capacities in pea

Jon Anders Stavang, Rolf Inge Pettersen, Micael Wendell, Knut Asbjørn Solhaug, Olavi Junttila, Roar Moe, and Jorunn E Olsen

## Supplementary Material

**Figure S1.** Responsiveness of  $R_{\text{night}}$  to temperature of young, expanding (leaf 5) and fully expanded (leaf 3) leaves of plants grown under negative or positive DIF to temperature. 95% confidence intervals were calculated by Sigmaplot 11.0.

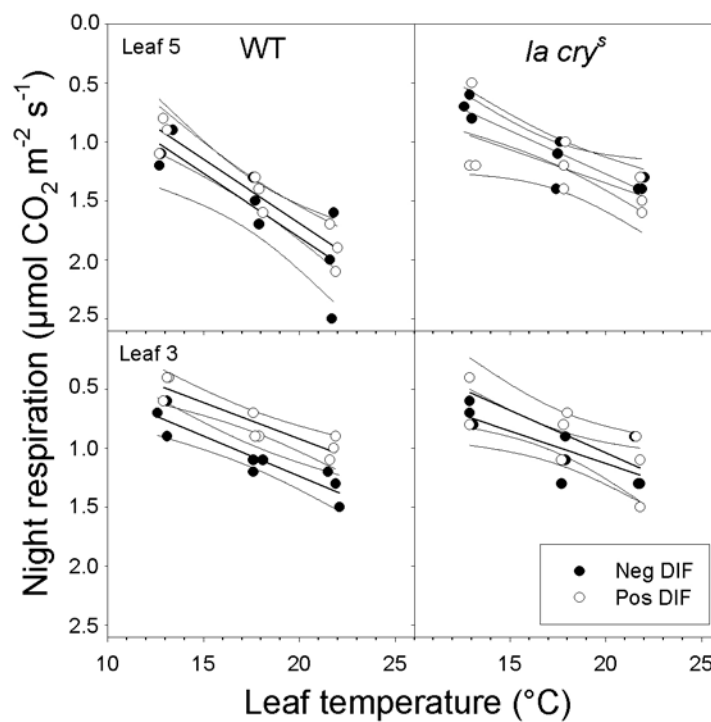

**Figure S2.** Responsiveness of light and CO<sub>2</sub> saturated photosynthesis to temperature of young, expanding (leaf 5) and fully expanded (leaf 3) leaves to temperature. 95% confidence intervals were calculated by Sigmaplot 11.0.

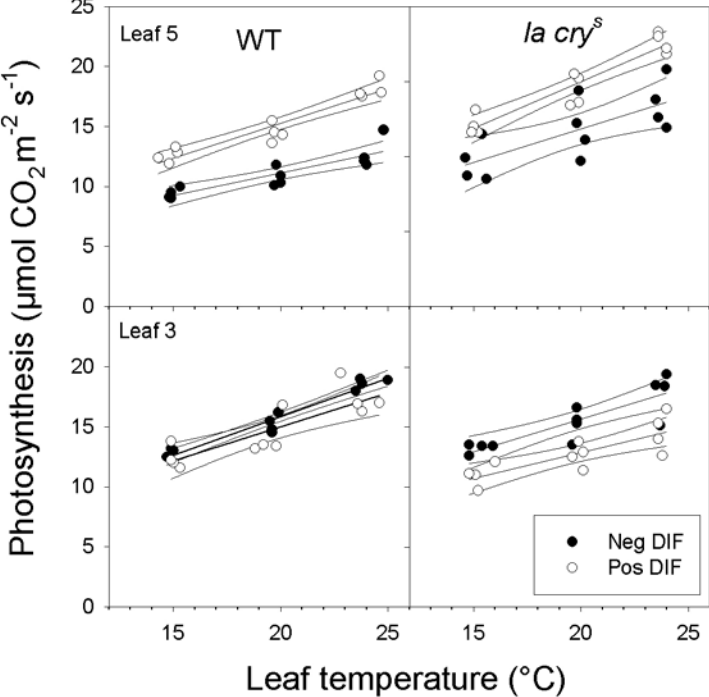

**Figure S3.** Light and CO<sub>2</sub> saturated photosynthesis of young (leaf 4-5) and fully expanded (leaf 2-3) leaves of WT pea measured under ambient growth temperatures in plants grown under negative (13°C/21°C DT/NT) and positive DIF (21°C/13°C DT/NT).

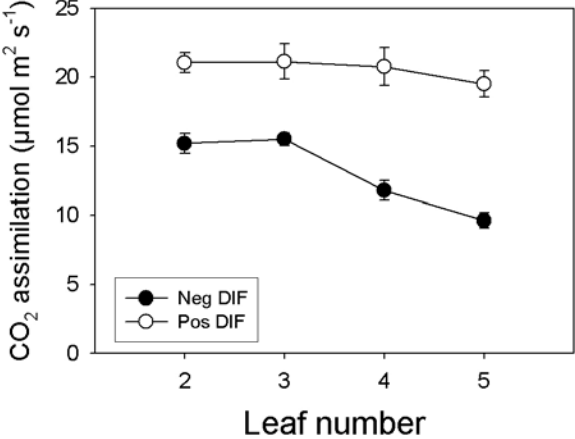

Supplement: erp366_1.pdf [file erp366_1.pdf]
